# Supplementary material for: A single-step multi-level supramolecular system for cancer sonotheranostics
Source: Royal Society of Chemistry journal article supplement (doi:10.1039/c8nh00276b), 2018-10-01
Supplement: c8nh00276b1.pdf [file c8nh00276b1.pdf]

1 **Supplementary Information for:**

2

3 **A Single-step Multi-level Supramolecular System for Cancer Sonotheranostics**

4

5 **Experimental Section**

6 *Materials:* Indocyanine green (ICG) were purchased from J&K Scientific Ltd. (Beijing, China).

7 DSPE-PEG (2000), lecithin, cholesterol and reactive oxygen species assay kit (DCFH-DA) were

8 purchased from Sangon Biotech (Shanghai) Co. Ltd. 4-nitrophenyl chloroformate 3-(4,5-

9 dimethylthiazol-2-yl)-2,5-diphenyltetrazolium bromide (MTT), thiophene-2-thiol,4,6-Dia-midino-2-

10 phenylindole (DAPI) were obtained from Sigma Aldrich Co. Ltd. (MO, USA). Dulbecco's modified

11 Eagle's medium (DMEM), and fetal bovine serum (FBS) were purchased from HyClone Inc. All

12 other chemicals were purchased from Sigma Aldrich in analytical grade and used without further

13 purification.

14 *Isothermal titration calorimetry (ITC):* We used a MicroCal ITC 200 microcalorimeter (GE

15 Healthcare) to detect the  $\text{Fe}^{3+}$  ions binding with ICG and  $\text{Fe}^{3+}$ /ICG respectively binding with lecithin

16 and cholesterol at 20 °C. Buffer solution was prepared as adding 70.5 mL  $\text{CH}_3\text{OH}$ , 11.5 mL  $\text{CHCl}_3$

17 and 1 mL n-hexane into 167 mL Hepes buffer (10 mM, pH = 6.8) and was standing about 24 h.  $\text{Fe}^{3+}$

18 analyte and the ligand solutions (ICG, lecithin and cholesterol) were prepared by adding them into

19 above buffer solution. The final concentrations were respectively 0.05 mM and 1 mM. The ligands

20 were injected 19 times and 2  $\mu\text{L}$  per time for injection. Measurements were repeated twice, and the

21 data was handled by OriginPro 8 software.

22 *Synthesize of  $\text{Fe}^{3+}$ /ICG@MB and Characterization:* Firstly, to prepare  $\text{Fe}^{3+}$ /ICG, 2.5 mg ICG was

23 dissolved in 12.5 mL mixed solvents ( $\text{CH}_3\text{OH}$  /  $\text{H}_2\text{O}$  = 2/1), then 12.5 mL  $\text{Fe}^{3+}$  (64.5  $\mu\text{M}$ ,  $\text{FeCl}_3$ ) was

24 added and stirring for 3 h. To form Liposome, 5 mg lecithin, 2.7 mg Cholesterol and 0.8 mg DSPE-  
25 PEG (2000) were respectively dissolved in chloroform. They were then combined in a flask with  
26 sonication for 5 min. Fe<sup>3+</sup>/ICG mixture was added into the liposome and sonicated for 5 min, then let  
27 sit for 5 min. Solvent was removed by rotary evaporation in 60 °C water bath. The self-assembly  
28 lipid film was set to 65 °C water bath for 1 min before 250 µL perfluoropropane lipid (C<sub>3</sub>F<sub>8</sub>, PFP,  
29 Aladdin). Sonication may be necessary to the resuspending of the lipid film. Sonication tank with 33%  
30 of 20 kHz was used to disperse the lipid film. The flask was filled with the gas and stored at 4 °C.

31 Fe<sup>3+</sup>/ICG@MB was then characterized by Zetasizer Nano-ZS instrument (Malvern Instruments,  
32 Malvern, UK), scanning electron microscopy- energy dispersive spectrum (SEM-EDS) (DXS-  
33 10ACRT), UV-Vis (THERMO), Spectral Domain Optical Coherence Tomography (SD-OCT),  
34 ultrasound imaging system (Vevo 2100 Imaging System), fluorescence imaging system (Carestream  
35 FX Pro) and samples which were storage at 4 °C were counted around 500,000 MBs mL<sup>-1</sup>. Flow  
36 cytometry was also used to measure the size changes of MBs.

37 *DCFH detection in tubes and in vitro*: To activate DCFH in tubes, 10 µL of DCFH-DA (10 mM)  
38 was added into 400 µL NaOH solution (10 mM) and the mixture was standing for 30 min without  
39 light, then it was neutralized with 2mL PBS (10 mM, pH = 7.4). A mixed solution of activated  
40 DCFH with different concentration (i.e., 0, 2, 5, 10, 20, 50 µg mL<sup>-1</sup>) of free ICG or Fe<sup>3+</sup>/ICG or  
41 Fe<sup>3+</sup>/ICG@MB at the volume ratio of 1:1 was sonicated with 1MHz , 1.61 W cm<sup>-2</sup> ultrasound by a  
42 multi-function ultrasound device (Selfridge, Beijing). UV-Vis system was applied to detect the  
43 fluorescence production at an excitation wavelength of 488 nm, emission wavelength of 525 nm.

44 The intracellular ROS levels were also determined by using LM3 cells (a human hepatocellular  
45 carcinoma cell line) and Hepa1-6 (a mice hepatic cancer cell line) respectively. Typically, Hep1-6

46 cells in Dulbecco's modified Eagle's medium (DMEM) were seeded into 6-well culture plates at a  
47 density of  $1 \times 10^6$  cells per well. After incubation for 12 h at 37 °C in a CO<sub>2</sub> incubator, the medium  
48 was replaced with fresh medium containing blank MB or free ICG or Fe<sup>3+</sup>/ICG@MB (ICG, 20 µg  
49 mL<sup>-1</sup>) respectively, and then incubated at 37 °C in a CO<sub>2</sub> incubator for 6 h. The culture medium was  
50 removed and the cells were rinsed three times with PBS buffer. The DCFH-DA (10 µM L<sup>-1</sup>,  
51 dissolved in culture medium without FBS) was added and incubated at 37 °C in a CO<sub>2</sub> incubator for  
52 20 min. The culture medium was removed and the cells were rinsed three times with culture medium  
53 without FBS. After treated with sono-activation at a frequency of 1 MHz, 30% pulse width and an  
54 average intensity of 1.61 W cm<sup>-2</sup> for 5 min separately. Similarly, LM3 was treated in the same way.  
55 Inversed Fluorescent Microscope images was using to reveal ROS generation.

56 *Cytotoxicity test, cell uptake and SDT efficacy in vitro*: The cytotoxicity, cell uptake and SDT  
57 efficacy of Fe<sup>3+</sup>/ICG@MB and other materials were evaluated in *vitro* using LM3 cells and Hepa1-6  
58 respectively. Cytotoxicity test was studied using the methyl thiazolyl tetrazolium (MTT) assay.  
59 Typically, Hepa1-6 cells were seeded into 96-well culture plates at a density of  $1 \times 10^4$  cells per well.  
60 After incubation for 12 h at 37 °C in a CO<sub>2</sub> incubator, the medium was replaced with fresh medium  
61 containing 20 µL dispersions (Fe<sup>3+</sup>/ICG@MB) at final ICG concentrations (0, 2, 5, 10, 20, and 50 µg  
62 mL<sup>-1</sup>), and then incubated for another 24h. Next, the medium was replaced with culture medium and  
63 10 µL of MTT solution (5 mg mL<sup>-1</sup>, dissolved in PBS) was added to each well. Moreover, the  
64 mixture was incubated for 4 h. The MTT solution was carefully removed and 150 µL dimethyl  
65 sulfoxide (DMSO) was added for 10 min in order to solubilize the violet formazan crystals.  
66 Thereafter, the absorbance of each well was measured using a Thermo Scientific Multiskan MK3

67 ELISA reader (Thermo Scientific) at 570 nm. Similarly, the cytotoxicity of those materials for LM3  
68 was also evaluated in the same way.

69 The optimal concentration of MTT assay was selected in the cellular uptake test. Hepa1-6 cells and  
70 LM3 cells were seeded into confocal dish at a density of  $1 \times 10^5$  cells per well respectively. After  
71 incubated for 12 h, the medium was replaced with fresh medium containing 20  $\mu\text{L}$   $\text{Fe}^{3+}/\text{ICG}@MB$  at  
72 final ICG concentration of 10  $\mu\text{g mL}^{-1}$ . After 6h incubation, the culture medium was removed, and  
73 the cells were rinsed three times with PBS buffer and fixed with 4% paraformaldehyde in PBS for 15  
74 min at room temperature. Then removed the paraformaldehyde solution and rinsed three times with  
75 PBS buffer. Next, the Diphenyl phenylindole (DAPI) was diluted to 300 nM with PBS and was  
76 incubated with cells for 15 min at room temperature. Finally, rinsed the confocal dish several times  
77 to remove all free DAPI. The cellular uptake was observed by confocal microscope (Olympus,  
78 Japan).

79 Next, various concentrations of blank MB, free ICG, and  $\text{Fe}^{3+}/\text{ICG}@MB$  as sonosensitizer agents  
80 were added into the Hepa1-6 cells and LM3 cells for *in vitro* cancer cell killing. Hepa1-6 cells and  
81 LM3 cells were seeded into 96-well culture plates at a density of  $1 \times 10^4$  cells per well. After  
82 incubated for 12 h, the medium was replaced with fresh medium containing 20  $\mu\text{L}$  dispersions (blank  
83 MB, free ICG, and  $\text{Fe}^{3+}/\text{ICG}@MB$ ) at final ICG concentrations (0, 5, 10  $\mu\text{g mL}^{-1}$ ). After incubation  
84 for 6h, all of the materials entered the cytoplasm well, cells of every well were treated with the  
85 focused ultrasound with a frequency of 1MHz, 30% pulse width and an average intensity of 1.61 W  
86  $\text{cm}^{-2}$  for 5 min separately. Moreover, the cells were incubated for another 18 h. The MTT assay was  
87 used to assess cell killing efficiency as the same method as above.

88     *Establishment of orthotopically implanted HCC model:* Animal experiments were approved by  
89     Animal Care and Use Committee (CC/ACUCC) of Xiamen University. Male BALB/C nude mice  
90     obtained from Beijing Vital River Laboratory Animal Technology Co. Ltd, weigh approximate 25 g.  
91     The orthotopic transplant HCC model were established as described previously literature.<sup>1</sup> Briefly, a  
92     laparotomy performed in anesthetized nude mouse. 25  $\mu$ L LM-3/Luc cells ( $1 \times 10^7$  cells  $\text{mL}^{-1}$ )  
93     injected into the right liver lobe of the nude mice. 7 days after the operation, bioluminescence  
94     imaging by IVIS Lumina II was used for screening out tumor-bearing mice to image after  
95     intraperitoneal injection of fluorescein substrate. At last, the tumor formation rate was 70%.

96     To simulate the human immune system, male C57BL/6 mice obtained from Xiamen University  
97     Laboratory Animal Center, mice weighing approximately 25 g, were used for assessing treatment  
98     effect. Tumor-bearing C57BL/6 mice obtained by the same method as above. Briefly, mice  
99     anesthetized, then 25  $\mu$ L Hepa1-6/Luc cells ( $1 \times 10^7/\text{mouse}$ ) injected into their right liver lobe by a  
100     laparotomy. 15 days after the operation, bioluminescence imaging performed with IVIS Lumina II  
101     after intraperitoneal injection of fluorescein substrate to screen out tumor-bearing mice for treatment.  
102     The tumor formation rate was 70%.

103     *In vivo ultrasound imaging and fluorescence imaging:* Tumor-bearing nude mice were randomly  
104     divided into two groups ( $n = 5/\text{group}$ ) and 100  $\mu$ L  $\text{Fe}^{3+}/\text{ICG}@MB$  ( $\text{ICG} = 2.5 \text{ mg kg}^{-1}$ ) was  
105     intravenously injected. One group of mice used for imaging directly after administration. While the  
106     other group mice were administered ultrasound immediately to burst the microbubbles in order to  
107     achieve accumulation in tumors and this process was also recorded by ultrasound imaging system  
108     (Vevo 2100 Imaging System). In this group, cold degassed water ( $4^\circ\text{C}$ ) used as the ultrasound  
109     couple medium, thus reducing hyperthermia during bursting. The frequency of the ultrasound was 1

110 MHz. Mice exposed to ultrasound for  $2.86 \text{ W cm}^{-2}$ , 5 min. The fluorescent signals were recorded by  
111 Carestream FX Pro at 0, 1, 2, 4, 8, 12 and 24 h and maximum excitation wavelength of 730 nm. Then  
112 all the mice euthanized. We collected tumors and major organs including heart, liver, spleen, lung,  
113 kidney and brain to visualize with Carestream FX Pro. Meanwhile, fluorescence imaging and tissue  
114 distribution of tumor-bearing mice was implemented as the same way.

115 *In vivo sonodynamic*: For reducing hyperthermia during treatment, cold degassed water ( $4 \text{ }^{\circ}\text{C}$ )  
116 used as the ultrasound couple medium. The temperature of ultrasonic probe showed no significant  
117 variation ( $< 3 \text{ }^{\circ}\text{C}$ ) after treatment. In detail, the tumor-bearing C57BL/6 mice were randomly di-  
118 vided into four groups ( $n = 6/\text{group}$ ): PBS group, blank MB group, ICG@MB group,  $\text{Fe}^{3+}/\text{ICG@MB}$   
119 group. The mice of control group intravenously injected with  $100 \text{ }\mu\text{L}$  PBS. The mice of blank MB  
120 group were injected with blank MB (lecithin,  $5 \text{ mg kg}^{-1}$ ) via the caudal vein, and the remaining two  
121 groups of mice were injected with ICG@MB (ICG,  $2.5 \text{ mg kg}^{-1}$ ) and  $\text{Fe}^{3+}/\text{ICG@MB}$  (ICG,  $2.5 \text{ mg}$   
122  $\text{kg}^{-1}$ ; lecithin,  $5 \text{ mg kg}^{-1}$ ) via the caudal vein. The four groups suffered ultrasound 5 min immediately  
123 after administration to blast microbubble as the same conditions as fluorescence imaging. And all of  
124 the four groups were executed further ultrasound treatment 5 min at 6 h post-injection as the same  
125 conditions as blasting. Throughout the trial period, bioluminescence imaging was performed using  
126 IVIS Lumina II after intraperitoneal injection of fluorescein substrate, both the tumor total ROI and  
127 the mice weights were recorded every 5 days. Moreover, liver function in mice were compared  
128 before and after treatment.

129 *Statistical analysis*: All data are reported as the means  $\pm$  the standard deviation (SD). Comparison  
130 of means was performed with Student's t test.

131

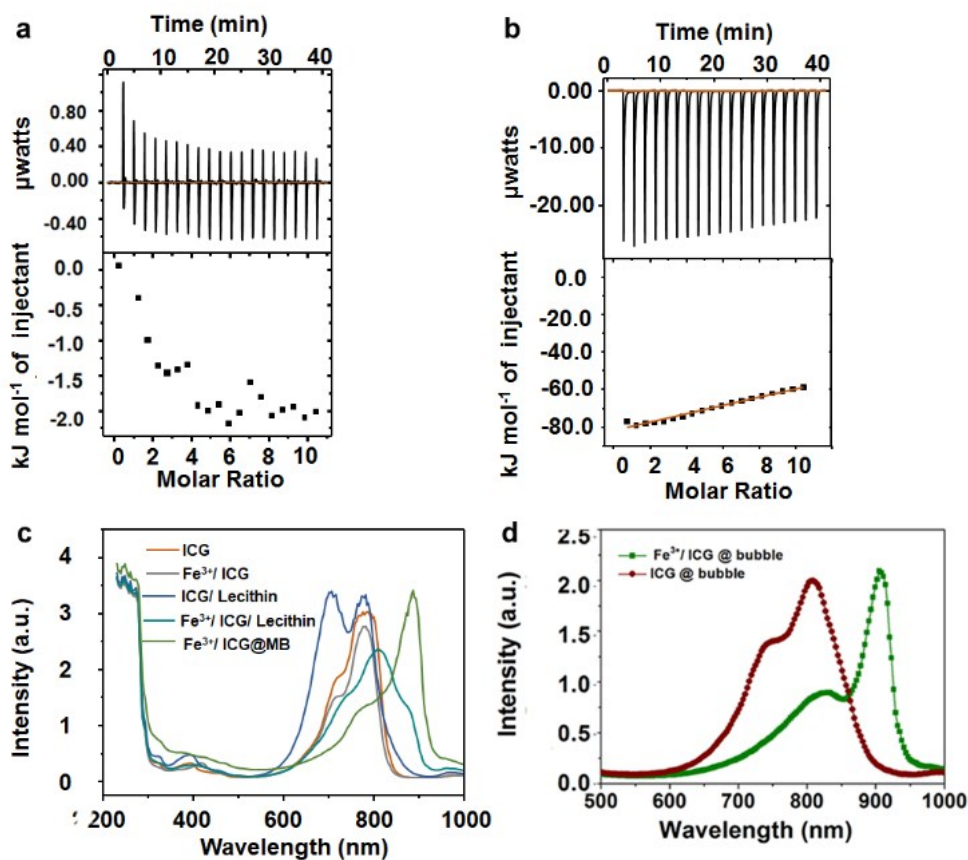

133  
134 **Fig S1.** Isothermal titration calorimetry (ITC) data of ICG (1 mM) and  $\text{Fe}^{3+}$  (0.05 mM) following  
135 lecithin (1 mM) adding **a)** and cholesterol **b)** adding. **c)** UV-Vis spectrum of ICG,  $\text{Fe}^{3+}/\text{ICG}$ ,  
136  $\text{Fe}^{3+}/\text{ICG}/\text{lecithin}$ , and  $\text{Fe}^{3+}/\text{ICG}/\text{MB}$ . **d)** The UV-Vis spectrum at the same concentration of ICG  
137 between ICG@MB and  $\text{Fe}^{3+}/\text{ICG}/\text{MB}$ .  
138

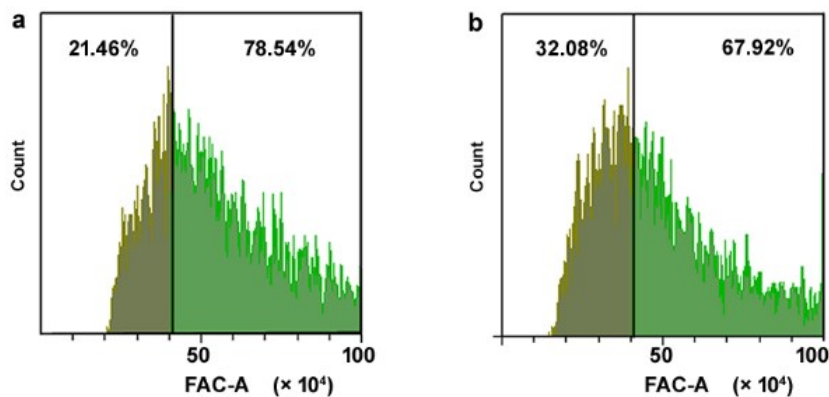

139  
140 **Fig S2.** Flow cytometry data revealed the size distribution of  $\text{Fe}^{3+}/\text{ICG}/\text{MB}$  before **a)** and after **b)**  
141 sonication ( $1 \text{ MHz}$ ,  $2.86 \text{ W cm}^{-2}$ ).  
142  
143

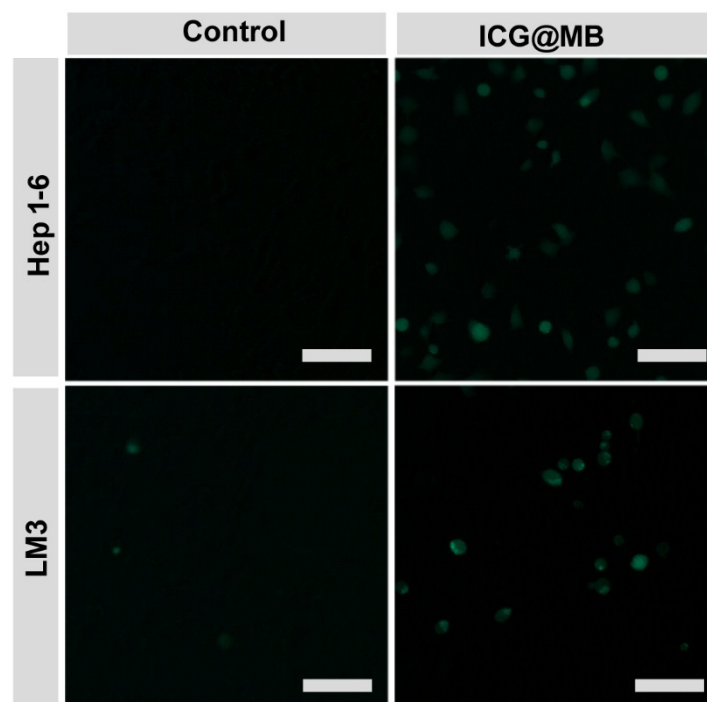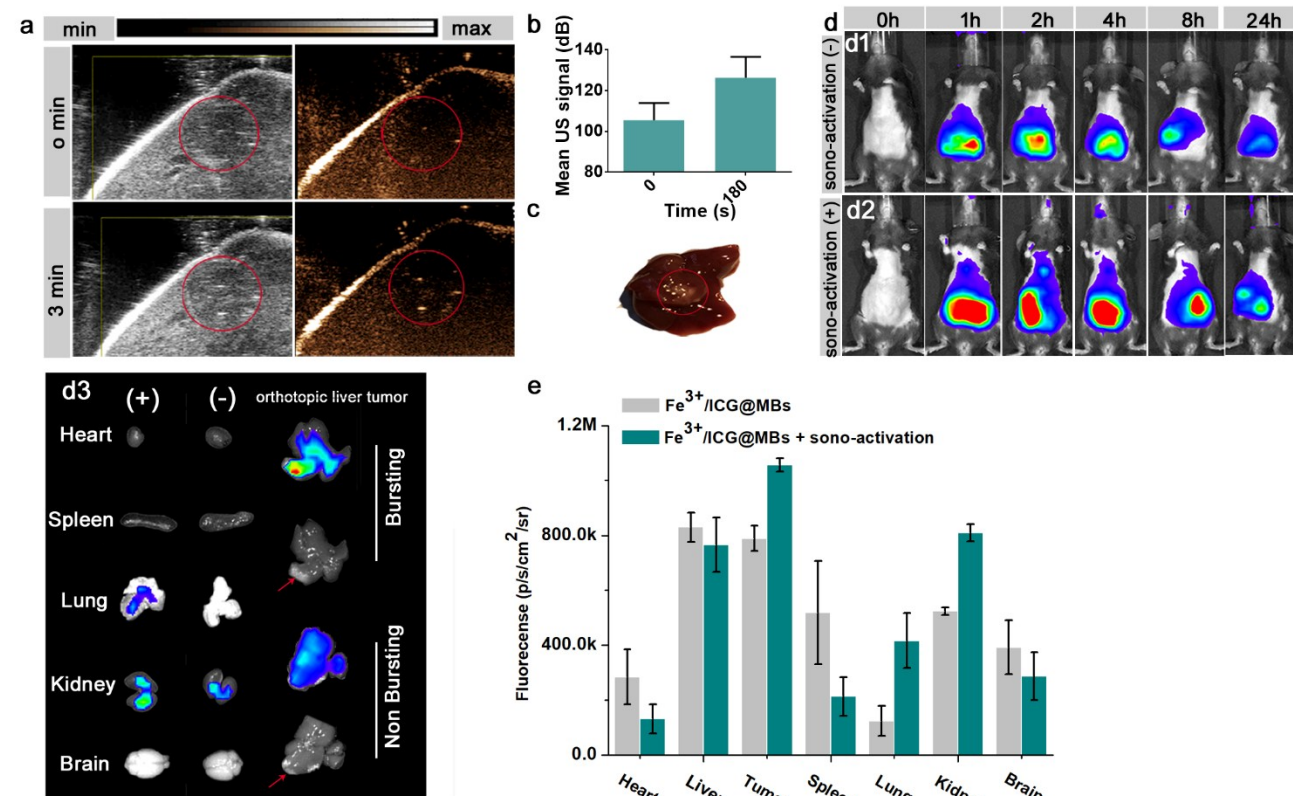

**Fig S4.** a) Detection of HCC *in situ* by sonography using 13–24 MHz transducer in B-mode and

contrast mode. Sonication subjected at 1 min for 10s and tumor contrast was observably enhanced at 3<sup>rd</sup> min . **b)** The quantitative US signal measurements of Fe<sup>3+</sup>/ICG@MB at different times (180 s). **c)** A photograph showing the liver with tumor. **d)** Time-dependent whole body NIR fluorescence images of orthotopic Hep1-6 tumor-bearing mice treated with Fe<sup>3+</sup>/ICG@MB (ICG = 2.5 mg kg<sup>-1</sup>) with **d1)** and without **d2)** sono-activation. Images were acquired at 0, 1, 2, 4, 8, 24 h post-i.v. injection. **d3)** The corresponding *ex-vivo* fluorescence images of resected organs and Hep1-6 tumor from the mice administrated with Fe<sup>3+</sup>/ICG@MB at 24 h post-injection. **e)** A fluorescence intensity analysis of major organs and tumors at 24 h post-injection of Fe<sup>3+</sup>/ICG@MB in orthotopic HCC-bearing mice.

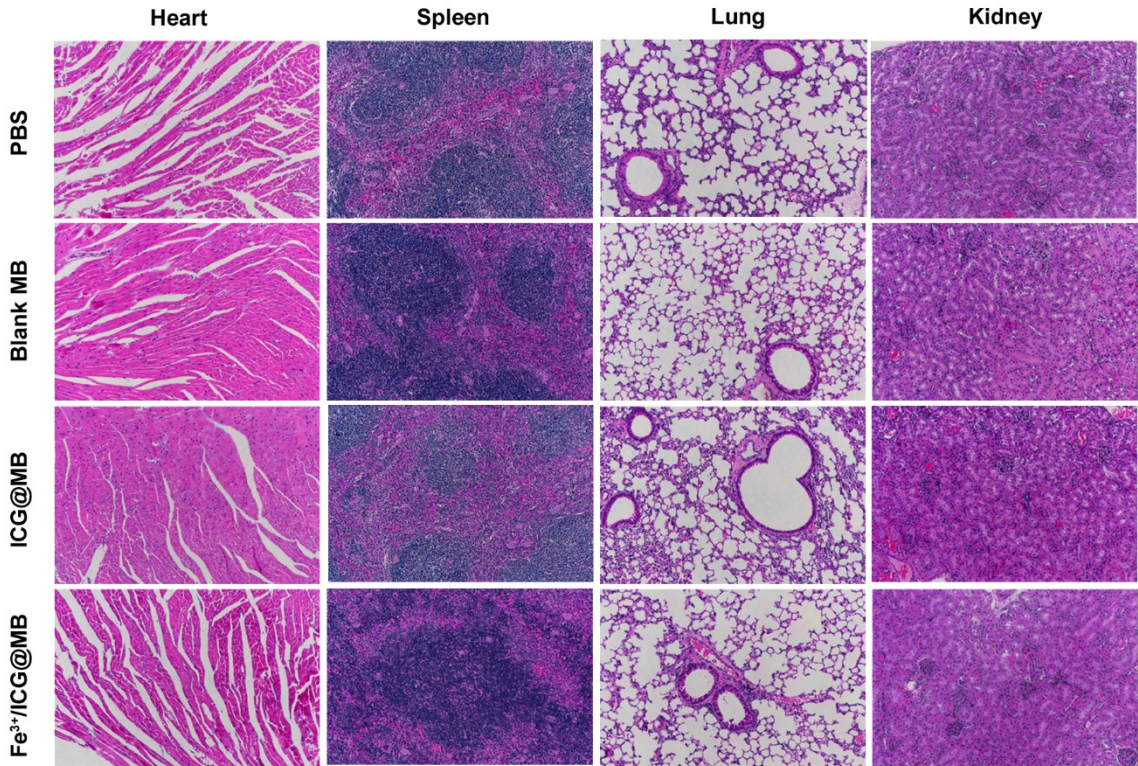

**Fig S5.** Hematoxylin and eosin (H&E) staining of organs from mice bearing HCC after Fe<sup>3+</sup>/ICG@MB-based SDT.

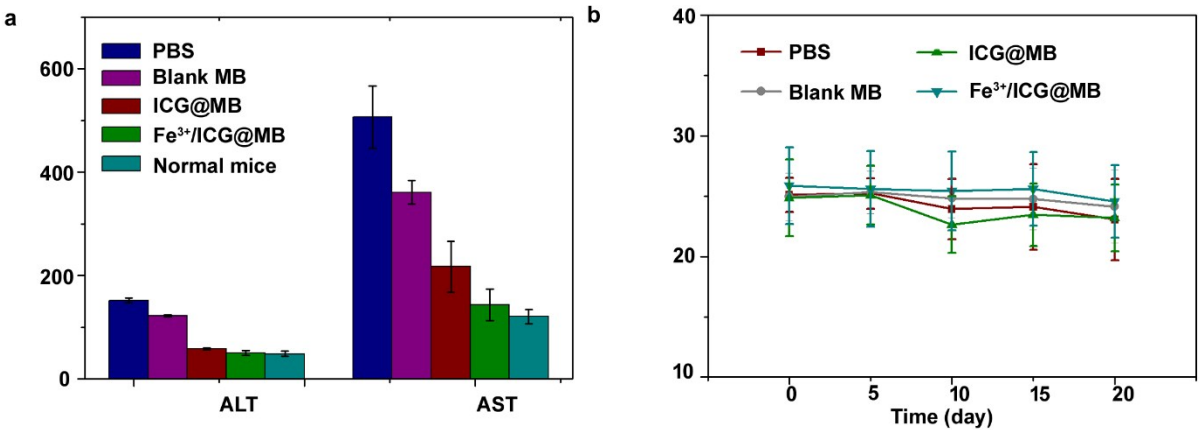

**Fig S6.** **a)** Serum chemistry of mice after 20 therapy days. **b).** The body weight curve for different

165 treatment group.

166

167 1 K. C. Kwon, E. Jo, Y. W. Kwon, B. Lee, J. H. Ryu, E. J. Lee, K. Kim, J. Lee, *Adv. Mater.* **2017**,

168 29, 1701146.

169
